# Supplementary material for: Snail1 suppresses TGF-β-induced apoptosis and is sufficient to trigger EMT in hepatocytes
Source: Oxford University Press journal article supplement (doi:10.1242/jcs.068692), 2010-10-07
Supplement: jcs068692figs1.pdf [file jcs068692figs1.pdf]

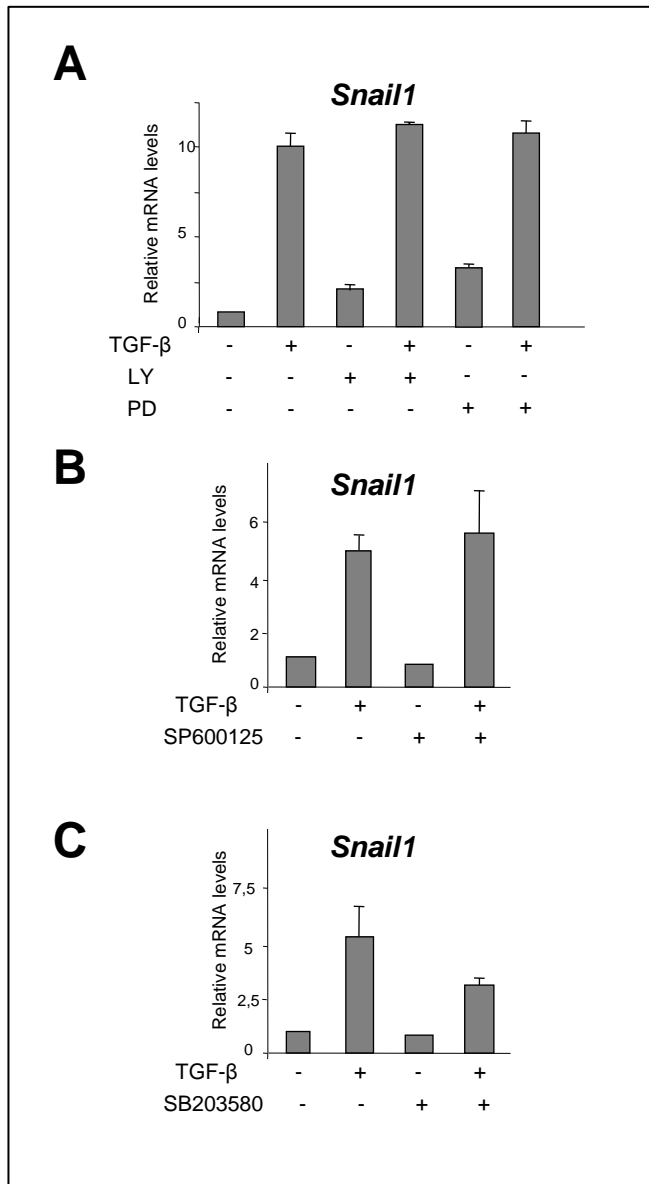

**Suppl. Fig. 1.** TGF- $\beta$ -induced *Snail1* transcription in fetal rat hepatocytes does not require activation of the PI 3-K, ERKs, c-Jun-N-kinase and p38 pathways. *Snail1* expression, analyzed by real time RT-PCR, in hepatocytes incubated in the presence or absence of TGF- $\beta$  (2 ng/ml, 3h) and either pre-treated or not (1 h before TGF- $\beta$  addition) with: (A) 20  $\mu$ M LY294002 or 50  $\mu$ M PD98059 (PI3-K and MEK inhibitors, respectively); (B) 40  $\mu$ M SP600125 (c-Jun-N-kinase inhibitor); (C) 5  $\mu$ M SB203580 (p38-MAPK inhibitor). *GAPDH* expression was used as a control of the cDNA templates. -RT lane, amplification in the absence of template. Concentrations of the different inhibitors were chose according to previous studies: LY294002 - Valdés et al. Exp Cell Res. 292:209-18 (2004) . PD98059 : Roncero et al., Biochim Biophys Acta. 1402:151-64 (1998). SP600125: Carmona-Cuenca et al. J Cell Physiol. 207: 322-30 (2006). SB203580: Bragado et al. Apoptosis. 12:1733-42 (2007).
