# Supplementary material for: Snail1 suppresses TGF-β-induced apoptosis and is sufficient to trigger EMT in hepatocytes
Source: Oxford University Press journal article supplement (doi:10.1242/jcs.068692), 2010-10-07
Supplement: jcs068692figs2.pdf [file jcs068692figs2.pdf]

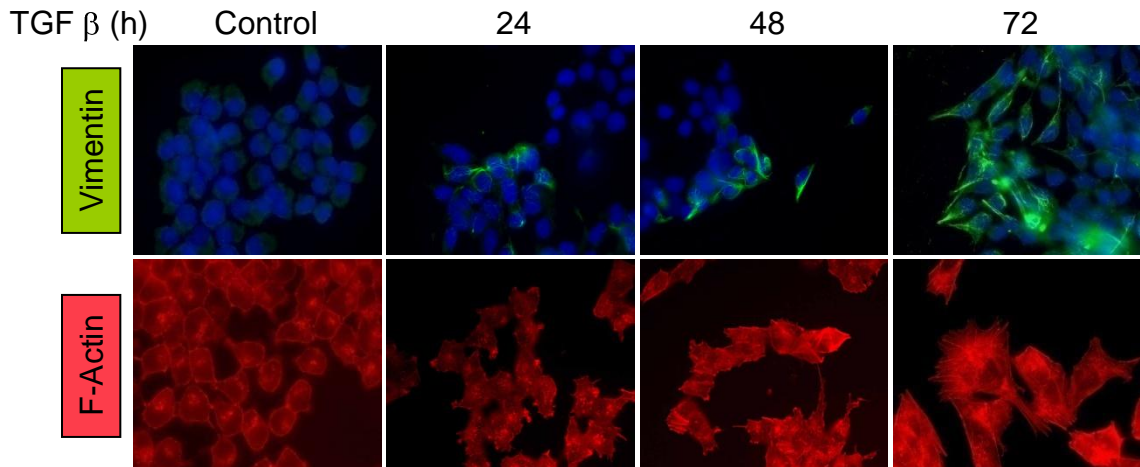

**Suppl. Fig. 2.** Immunofluorescence detection of Vimentin and F-actin filaments (Phalloidin) in FaO cells treated with TGF- $\beta$  (2 ng/ml). See Fig. 2 and Materials and Methods for details.
