# Supplementary material for: Snail1 suppresses TGF-β-induced apoptosis and is sufficient to trigger EMT in hepatocytes
Source: Oxford University Press journal article supplement (doi:10.1242/jcs.068692), 2010-10-07
Supplement: jcs068692figs3.pdf [file jcs068692figs3.pdf]

## NFKB binding site in *Snail1* promoter

### Alignment and position (from ATG) of first nucleotide of KB1 site

Mouse: -672, Rat: -667; Human: -957

```
Mouse   cagaagttactgattcttaccccgggcctttccccctcgggtgcttcttcacttcc
Rat     ctgaaattactgactctaacctcgggcctttccccctcgggtgcttcttcacttcc
Human   aagcagttgccacttcttccctcgggccttttccccttgataattcttcacttcc
```

### Alignment and position (from ATG) of first nucleotide of KB2 site

Mouse: -162, Rat: -163; Human: -171

```
Mouse   cagccattggctcagccttgacaaaggggcgtgaccaacagtagcggtcacgccc
Rat     cagctattggcgcaatcttgacaaaggggcgtgatcgtagccgaggccacgccc
Human   ctccgattggcgcgagggtgacaaaggggcgtggccc---agataaggccccgccc
```
