# Supplementary material for: Snail1 suppresses TGF-β-induced apoptosis and is sufficient to trigger EMT in hepatocytes
Source: Oxford University Press journal article supplement (doi:10.1242/jcs.068692), 2010-10-07
Supplement: jcs068692figs4.pdf [file jcs068692figs4.pdf]

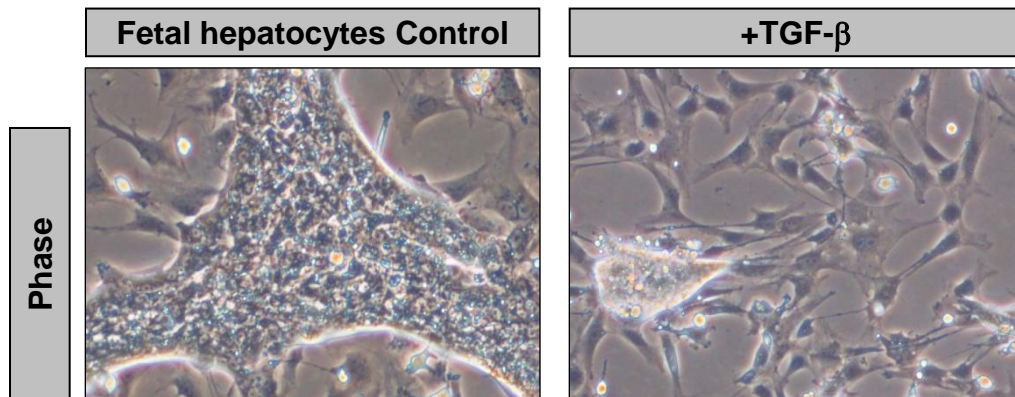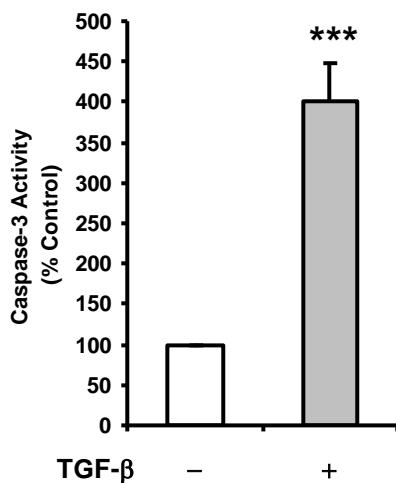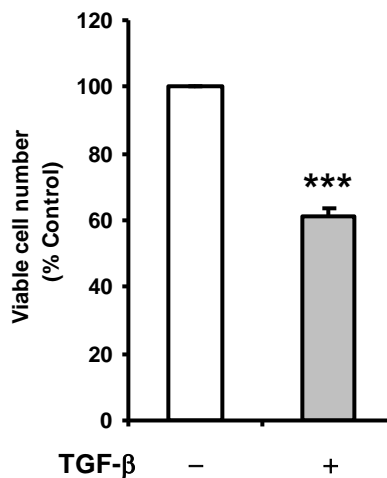

**Suppl. Fig. 4.** TGF- $\beta$  (2 ng/ml) induces EMT and cell death in rat fetal hepatocytes. See Materials and Methods for details. We have extensively studied this transition previously (Sánchez et al., *Exp Cell Res.*, 1999; Valdés et al., *Mol Cancer Res.*, 2002; Del Castillo et al., *Exp Cell Res.*, 2006).
